*L. ochracea* sheath formation and motility model

1 A model for sheath formation coupled to motility in *Leptothrix ochracea*.

2

3

4 James Vesenka\*<sup>1</sup>, James Havu<sup>2</sup>, & David Emerson<sup>3</sup>

5

6

7 <sup>1</sup>University of New England, Biddeford, ME

8 <sup>2</sup>Florida Institute of Technology, Melbourne, FL

9 <sup>3</sup>Bigelow Laboratory of Ocean Sciences, East Boothbay, ME

10

11

12

13

14

15

16

17

18

19

20 \*Corresponding author: Dr. James Vesenka, Morgane Hall 016, University of New England,  
21 Biddeford, ME 04005; [jvesenka@une.edu](mailto:jvesenka@une.edu)

22

23

## *L. ochracea* sheath formation and motility model

### 1 **Abstract**

2           Optical and atomic force microscopy (AFM) of naturally occurring *Leptothrix ochracea*  
3 was used to study the fine structure of sheaths and cells. Morphology of young sheaths suggests  
4 the scaffold chains have strong self-adhesion. Evidence from un-encapsulated cells indicates  
5 fresh scaffold production through cell walls. Simple diffusion arguments are used to explain the  
6 morphology of the sheath structure. We propose a novel cell motility model based on previously  
7 published video data, our AFM images of naked cells, and simple flow calculations. The model  
8 indicates that motility results from differential shear forces resulting from extrusion of sheath  
9 material that passively pushes a filament of connected cells forward as the surrounding sheath  
10 material hardens behind the cell train.

11

### 12 **Introduction**

13 *Leptothrix ochracea* is a common, sheath-forming microorganism that lives in freshwater  
14 habitats that have high concentrations of soluble, reduced iron (Fe(II)). Since iron is the 4<sup>th</sup> most  
15 abundant element in the Earth's crust, these habitats are common. They are typically found  
16 where there is standing or slowly flowing water enriched in Fe(II), examples include streams,  
17 wetlands, and springs, as well as technical environments like water distribution pipes (Emerson  
18 et al., 2010). Where these bacteria occur, it is common to find rust-colored deposits or  
19 precipitates of Fe-oxyhydroxides that form loosely aggregated microbial mats made up of a  
20 consortia of microorganisms, that are dominated by bacteria involved in Fe-cycling (Roden et al.,  
21 2012). When present, *L. ochracea* is often the dominant morphotype observed in these habitats  
22 due to its copious production of tubular sheaths that are encrusted with Fe minerals, principally  
23 ferrihydrite. These microbial iron mats can accrete rapidly, and due to their large surface area,

## *L. ochracea* sheath formation and motility model

1 the sheath/mineral matrix has the ability to influence the chemistry of the local waters that they  
2 contact (Chan et al., 2016).

3

4 While *L. ochracea* was first described 120 years ago, it has yet to be cultivated reliably in the  
5 laboratory, thus much about its life remains a mystery (van Veen, et al 1978). Recently, using  
6 cultivation-independent techniques it was shown that *L. ochracea* is a close relative of other  
7 sheath-forming species like *Leptothrix cholodnii* and *Sphaerotilus natans* (Fleming et al., 2011).

8 Both of these latter organisms are heterotrophic bacteria that utilize organic matter for growth,  
9 and do not require Fe(II) as an energy source. *L. ochracea* does require Fe(II) for growth,  
10 although it remains unknown if Fe(II) is its primary energy source; nonetheless, it will not grow  
11 on the heterotrophic medium utilized by *L. cholodnii* (Fleming and Emerson, manuscript in  
12 preparation). Another important difference between these organisms, is that in cultures of *L.*  
13 *cholodnii*, the sheaths are nearly all full of cells, while for *L. ochracea*, even in the most actively  
14 growing microbial mats, only about 10% of the sheaths contain cells (van Veen, et al 1978;  
15 Chan, et al 2016). In all these organisms, sheath production is a coordinated event that results in  
16 the formation of a resilient biological structure. A sheath affords these microbes certain benefits,  
17 like protection from predators, primarily protozoa that cannot tear open the sheaths, and  
18 positioning, if the sheath is attached by a hold fast to a solid substrate, then the organism can  
19 maintain position in an environment favorable for its growth. In the case of *L. ochracea* it is also  
20 likely that the sheath plays an important role in protecting the cells inside from becoming  
21 encrusted in solid Fe-oxides that precipitate as a result of their growth.

22

23 *L. ochracea* is capable of prodigious sheath production: it is estimated that a chain of 100 cells

## *L. ochracea* sheath formation and motility model

1 that are about 0.5 mm in length can produce 1 meter per day of sheath (Fleming and Emerson,  
2 manuscript in preparation). The sheath is composed largely of Fe-oxyhydroxides that are by  
3 byproducts of Fe-oxidation. Analysis of *L. ochracea* sheaths collected from an iron mat by  
4 scanning transmission X-ray microscopy (STXM) and near edge X-ray absorption fine structure  
5 spectroscopy (NEXAFS) revealed that it contains an organic component, possibly a  
6 polysaccharide (Chan et al 2009). Consistent with these observations, Suzuki et al. have (2011)  
7 used high-angle annular dark-field scanning electron microscopy to show that *L. ochracea*  
8 sheaths contain iron, carbon and oxygen, again indicative of the sheath being composed of an  
9 organo-metallic matrix. However, beyond these physical observations little is known about the  
10 chemistry of the sheath, or its exact role in Fe-oxidation.

11  
12 Much more is known about sheath formation in the heterotroph, *L. cholodnii*. The sheath of this  
13 organism consists of a fibrillar matrix, with individual fibers composed of complex  
14 polysaccharides made up of uronic acids, amino and neutral sugars, and peptides (Emerson and  
15 Ghiorse, 1993, Takeda et al., 2005). A major building block of these fibrils is a novel  
16 glycoconjugate that contains N-acetyl-L-cysteinylglycine. Takeda et al. (2009) have proposed  
17 that the sheath fibrils of *L. cholodnii* can spontaneously assemble through the formation of  
18 disulfide bonds from side chains containing L-cystine and hydrophobic interactions from 3-  
19 hydroxypropionic acid substituted for glycan units in the chain. The extensive disulfide bonding  
20 knits the fibrils together into a robust tubular structure that is resilient to chemical or physical  
21 disruption. Similar properties are shared with another sheath-former, *Sphaerotilus natans*, that is  
22 in the same family of microbes as *L. cholodnii* and *L. ochracea* (Takeda et al., 2007).

23

## *L. ochracea* sheath formation and motility model

1 In addition to having fascinating chemical and physical properties that contribute to the unusual  
2 lifestyle of these bacteria, it is proposed that the nano-crystalline arrays of reactive iron-oxides  
3 that coat the *L. ochracea* sheath may have properties suitable for commercial applications  
4 (Kunoh et al., 2015). Some potential uses include serving a catalyst for organic synthesis (Ema et  
5 al., 2013), or improving the performance, cost, and life cycle of lithium-ion batteries (Sakuma et  
6 al., 2014). In addition, their capacity for adsorption of other metals like arsenic and lead, as well  
7 as organics could be useful in water treatment schemes that promote their growth using naturally  
8 Fe-rich waters (Emerson and de Vet, 2015).

9  
10 Despite the many fascinating questions about sheath production in *L. ochracea*, the lack of a  
11 sufficient laboratory model for *L. ochracea*, means there is still much to learn about the  
12 mechanism of sheath formation or details of its ultrastructure. The work described here utilized  
13 atomic force microscopy (AFM) to gain a better understanding of the structural details of  
14 naturally occurring *L. ochracea* sheaths. The goal is to develop a model that explains their  
15 physical characteristics and possible mechanism of motility consistent with what is known about  
16 the biology of this unique microorganism.

## 17 18 **Methods**

### 19 **Sampling for *L. ochracea* and epifluorescence imaging**

20  
21 Fresh sheaths of *L. ochracea* were collected from iron-rich seeps in Boothbay Harbor and  
22 Kennebunkport, Maine. The Boothbay site has been described previously (Chan et al 2016). The  
23 site in Kennebunkport (43.362° N, 70.477° W) was a small roadside ditch (pH 6.2) located

## *L. ochracea* sheath formation and motility model

1 beside a pine forest. This site had slowly flowing water 5 -10 cm deep. We were unable to  
2 measure the concentration of Fe(II) at this site. Nonetheless, the abundant presence of iron mats  
3 observed as flocculent, rust colored material that loosely adhered to the sediment is consistent  
4 with micromolar concentrations of Fe(II). Concentrated sheath samples in their original aqueous  
5 media was collected with a pipet into Eppendorf tubes and refrigerated at 4°C until being further  
6 processed, within 24 hours, as described below.

7  
8 Cells within sheaths were located by staining and imaging by epifluorescence microscopy. Dilute  
9 solutions of Syto13 DNA stain (Molecular Probes/Invitrogen) were added (final Syto13 dilution  
10 1:250) to these samples and samples were gently vibrated to disperse clumps of sheaths. 20µL  
11 aliquots of the solution were pipetted onto freshly cleaved mica and allowed to dry under  
12 ambient conditions – effectively incubating the stain with the cells for about 20 minutes while  
13 slowly drying. A Zeiss AX10 fluorescence microscope illuminated by Lumen Dynamics X-Cite  
14 Series 120Q UV source was used to identify regions containing intact sheaths, collapsed sheaths  
15 and sheaths containing *L. ochracea* cells (Fig 1). Fluorescent and bright field images were  
16 digitally collected to aid in "optical navigation" in the AFM. That is, once stained regions of  
17 interest were identified, the samples were transferred to the AFM and identified using the AFM's  
18 video microscope in order to place the AFM probe over the region of interest. The samples were  
19 imaged with a Digital Instruments Nanoscope IIIa controller and Multimode TopView AFM  
20 with long working distance (35mm) 400x optical navigation system in ambient air. No  
21 noticeable contamination (loss of resolution) of the tip when imaging sheaths was observed  
22 during imaging – the same tip could be used for days. However imaging naked cells did lead to  
23 tip contamination. The AFM probes used were Budgetsensors Single HiRes150 (resonance

## *L. ochracea* sheath formation and motility model

1 frequency  $\approx$  150kHz) to image the samples at a scan rate of 500nm/second and later analyzed  
2 using Nanoscope software.

3

### 4 **Results**

#### 5 **AFM Imaging**

6

7 Fresh sheaths of *Leptothrix ochracea* from natural seeps were characterized using both optical  
8 and atomic force microscopies (Figure 1). A combination of brightfield and fluorescence  
9 imaging of Syto-13 stained samples was used to rapidly identify cells, as well as intact and  
10 collapsed sheaths for AFM imaging. It was routinely observed that the drying process required  
11 for AFM analysis resulted in immature sheaths, also referred to as "proto-sheaths", to collapse,  
12 and in cases where cells were present in the collapsed sheath they could be observed by AFM.  
13 This was fortuitous, since AFM is a surface sensing technique and unable to detect cells in intact  
14 (un-collapsed) sheaths. Brightfield (Figure 1a) and fluorescence (Figure 1b) microscopy made it  
15 possible to quickly identify intact (dark) and collapsed (fainter) sheaths and cell filaments stained  
16 by Syto13. The low magnification optical images were used to navigate to regions of interest for  
17 higher resolution AFM imaging. Figure 1c, d, and f is the region identified in the small square in  
18 in Figure 1a. Figure 1c is a top view image in which color indicates height above substrate,  
19 shown slightly rotated to enhance contrast in 3D in Figure 1f. Figures 1d, e are filtered images  
20 of Figure 1c to highlight the sheath ultrastructure. White arrows identify cells inside a collapsed  
21 sheath, orange arrows indicate an empty sheath, and the red arrows indicate cells inside an  
22 inaccessible (to AFM) intact sheath. Cells imaged inside sheaths appear twice as thick as the  
23 naked cells, which may be a result of protection from dehydration.

## *L. ochracea* sheath formation and motility model

1  
2 The use of high pass filtering (Figure 1d) and to a lesser extent phase imaging (Figure 1e)  
3 revealed details at nanometer resolution about the sheath and cell structure. Consequently, high  
4 pass filtering was used extensively for this work to characterize the irregular fibril-rich matrix of  
5 the sheath exterior (Figure 1d). Phase imaging can indicate tip-sample chemistry, but Figure 1e  
6 shows little contrast, which indicates the AFM probe did not adhere significantly to the sheaths.  
7 This is important because it ensured that sample details were not being obscured by tip-sample  
8 interactions and minimized imaging artifacts. Figure 1f shows a three-dimensional rendering of  
9 the intact and collapsed sheaths with a highly exaggerated vertical scale to emphasize the  
10 differences between collapsed and intact in sheath features.

11  
12 Figure 2 provides examples of individual, intact fresh sheaths with a variety of internal fiber  
13 widths. The width of the individual fibrils on the mica surface averaged about  $22\pm 5\text{nm}$  (e.g. as  
14 seen in Figure 2b red arrow). These fibrils were about the same dimensions as the width of  
15 single fibers found within immature sheaths (e.g. Figure 2c,  $24\pm 5\text{nm}$  white arrow on sheath).  
16 This collapsed immature sheath also had a single wall thickness of  $22\pm 3\text{nm}$  (image not shown),  
17 suggesting it consists only of a single fiber layer. Figure 2c,f are examples of younger cell-  
18 filaments within new intact sheaths. Some intact sheath fibers (Figures 2d,e) and many fibers on  
19 collapsed sheaths had slightly larger diameters ( $35\pm 10\text{nm}$ ). Lastly, intact sheaths with much  
20 wider fibers averaging about  $62\pm 5\text{nm}$  in diameter were also observed, presumably these are more  
21 mineralized due to continued acquisition of Fe-oxides (e.g. Figure 2f). In Figures 2d-f note that the  
22 scaffold appears slightly oriented in the direction diagonal or parallel to the long length of the  
23 sheath. Details of numerous cell measurements taken by the AFM are summarized in Table 1.



## *L. ochracea* sheath formation and motility model

1  
2 Figure 3 appears to be a fortuitous observation of a line of cells both partially within a fresh  
3 sheath and outside the sheath. Close examination of the naked cells indicates they are in the  
4 process of exuding sheath material (orange arrows surrounding cells in Figure 1c), perhaps at the  
5 instant the cells were drying down on the substrate. If this is the case we can surmise that the  
6 sheath material is exuded along the entire length of the cell out to a width approximately  
7 equivalent to that of the sheath dimensions. The material coming from these naked cells appears  
8 to be sticky and similar in properties to those in Figures 2b,c. This was confirmed by the  
9 observed loss of resolution while imaging naked cells that implies a different chemistry between  
10 tip and sample. Careful observation of the leading edge of the cells (Figure 3a white arrow),  
11 identified as lacking an obvious sheath (Figure 3a red arrow) of the cell line indicates the  
12 extruded material is thinner in the front of the chain than at the trailing edge, suggesting an  
13 accumulation of sheath material along the length of the cell filament.

14  
15 Figure 4a,b highlights the large differences in fibril lengths, confirmed by grain size analysis  
16 (Figure 4c,d). Figure 4a shows an immature collapsed around a cell filament on the left, and an  
17 older, intact sheath on the right; the vertical scale is exaggerated to show the height differences  
18 between collapsed and uncollapsed sheaths. The boxed region of Figure 4a is analyzed for grain  
19 size in Figures 4c,d. Grain size analysis consists of manually determining a background level  
20 that converts the area to be analyzed into a binary mixture of either bright islands, or "grains"  
21 consisting of contiguous pixels, separated by dark boundaries. The manual background (dark  
22 boundaries) determination consisted of visual identification of fibers that appeared to stick out  
23 from the surface of the sheath. Once the background level is determined the software performs a

## *L. ochracea* sheath formation and motility model

1 distribution analysis of grain frequency versus contiguous pixel area. Both small (Figure 4c) and  
2 large (Figure 4d) grain distributions were manually identified. Figure 4c records grains smaller  
3 than  $4300\text{nm}^2$  (average  $620\text{nm}^2$  with standard deviation of  $770\text{nm}^2$ ); note how the smaller red  
4 highlighted polymers predominate over the immature sheath on the left side of the image. Figure  
5 4d records grains larger than  $4300\text{nm}^2$  (average of  $7900\text{nm}^2$  with standard deviation  $5400\text{nm}^2$ );  
6 note how the longer fibrils predominate over the intact sheath to the right of the image. Note as  
7 well that the longer fibers are oriented more parallel to the sheath axis, as described above for  
8 Figure 2 d,e,f, and also shown in Figure 4b. We speculate that these differences are due to  
9 variations in growth conditions discussed in Figure 5.

10

## 11 **Discussion**

### 12 **Sheath Characterization:**

13 The highest resolution AFM imaging comes from imaging dried samples, a process that causes  
14 some sheaths to collapse, seen in Figure 1. We will use capillary forces to estimate a mechanical  
15 property associated with the sheaths. The Young-LaPlace Equation can be used to estimate the  
16 capillary pressure on a drying sheath due to surface tension:

$$17 \quad \Delta P = \gamma \left( \frac{1}{R_x} + \frac{1}{R_y} \right) \quad \text{Equation 1}$$

18 Where  $\gamma$  is the surface tension of water ( $73.39 \text{ dyn/cm} = 0.07339 \text{ N/m}$  at  $15^\circ\text{C}$ ), and  $R_x$  and  $R_y$   
19 are the radius of curvatures both perpendicular and parallel to the sheath. For a long straight  
20 sheath  $R_x = \infty$  (parallel to the sheath direction) and  $R_y = 600\text{nm} = 6 \times 10^{-7}\text{m}$ , then the capillary  
21 pressure is about  $1.2 \times 10^5$  Pascals ( $>$  one atmosphere) or  $120\text{nN}$  over a square micron of sheath  
22 surface. This estimate of the force needed to collapse sheaths by drying is within the range that  
23 the AFM probe can manipulate them. We can estimate this force as follows: The sharp probes

### *L. ochracea* sheath formation and motility model

1 used in this study (radius of curvature initially  $\leq 5\text{nm}$ ) have a spring constant "k" of about  
2 10nN/nm. A Hooke's Law calculation of the normal force on the sample in contact mode with a  
3 vertical displacement " $\Delta y$ " of 100nm yields force of  $F=k\Delta y \approx 1000\text{nN}$ . The coefficient of  
4 friction between mica and silicon tip is 0.07 (Putnam et al. 1995). Thus the shear force in  
5 contact AFM imaging mode is on the order of 100nN. Indeed, we have been able to cut the  
6 sheaths with sufficient normal force (images not shown).

7  
8 An important related mechanical property is the elastic modulus (a.k.a. Young's Modulus "Y")  
9 that we will now estimate based on AFM image data. Figure 1 shows evidence that undecorated  
10 sheaths collapsed upon drying while older sheaths are more robust, presumably from greater  
11 structural integrity due to increased mineralization. From the capillary pressure estimate  
12 (Equation 1) and a reasonable assumption of strain ( $\approx 1\%$ ) on the sheath we can approximate the  
13 Elastic Modulus (Y) of the fresh, non-mineralized sheaths:

$$14 \quad Y = \frac{\text{stress}}{\text{strain}} = \frac{\Delta P}{0.01} \approx 10^7 P \quad \text{Equation 2}$$

15 This low value is on the same order of elasticity as rubber, and 100 times smaller than  
16 bacteriophage capsids (Ivanovska 2004). The implication is that non-mineralized sheaths are  
17 only stable when hydrated and that mineralized sheaths are stiffer, thus do not collapse upon  
18 dehydration. AFM techniques have the ability to "tap" with large amplitudes and well-  
19 characterized forces in order to measure elastic moduli. Future efforts are directed at making  
20 elastic modulus measurements to enable us to better characterize the elasticity of the sheaths at  
21 different stages in their growth cycle.

22

## *L. ochracea* sheath formation and motility model

1 The data from Table 1 was generated after making corrections for the finite tip geometry of the  
2 AFM probe. Vesenka et al. (1992, 1993) developed simple geometric corrections based on a  
3 tube of apparent width " $W_{app}$ " lying flat on a substrate. The topographic features are a result of  
4 artificially broadening (hence "apparent") by the finite half angle " $\alpha$ " of a pyramidal shaped tip.  
5 The resulting corrected diameter " $D$ " of the sheath is approximately equal to:

$$6 \quad D = \frac{W_{app}}{(\cos\alpha + (1 + \sin\alpha)\tan\alpha)} \quad \text{Equation 3}$$

7 For  $W=1600\text{nm}$  and  $\alpha = 27.5^\circ$  for the probes used in this study, the apparent diameter of a sheath  
8 on the substrate should be about  $1000\text{nm}$ .

9 A collapsed sheath of width " $W$ " and height " $H$ " above the substrate (double wall thickness of  
10 sheath) will have a diameter " $D$ " approximately equal to:

$$11 \quad D = \frac{2(W-H)}{\pi} \quad \text{Equation 4}$$

12 For  $W = 2200 \text{ nm}$  sheath of  $H = 200 \text{ nm}$ ,  $D = 1100 \text{ nm}$ , in agreement with the average sheath  
13 diameters measured in this study. This confirms the observations that the sheaths are likely  
14 composed of a single layer of fibrils described in Figure 2.

15

### 16 **Sheath formation**

17 At present, the best models for sheath formation among the *Leptothrix/Sphaerotilus* family of  
18 bacteria come from studies on the heterotrophic *L. cholodnii*. Elegant work by Takeda and  
19 colleagues used microslides to grow either *L. cholodnii* (2012a) or *S. natans* (2012b), and  
20 directly observe sheath formation. The cell filaments remained stationary, and it was clearly  
21 shown that cell growth and elongation and sheath formation co-occurred at the terminus of cell  
22 filaments for both species. They proposed that sulfhydryl containing microfibrils are excreted  
23 from the cell and diffuse to the sheath layer where they coalesce into a cohesive sheath. It is not

## *L. ochracea* sheath formation and motility model

1 known if *L. ochracea* produces similar glycoconjugates. Attempts at staining *L. ochracea*  
2 sheaths with fluorescein-labeled N-maleimide that binds specifically to free sulfhydryl groups  
3 have not been successful (D. Emerson, unpublished results). For these reasons, and other reasons  
4 explained below, we believe sheath genesis in *L. ochracea* follows a different model.

5  
6 There are other important physiological differences between *L. ochracea* and the heterotrophic  
7 sheath-formers. *L. ochracea* requires Fe(II) and Fe-oxidation for growth, thus sheath formation  
8 and mineral formation appear tightly coupled (Fleming et al., 2011). A recent study of intact, *L.*  
9 *ochracea* mats revealed that empty sheaths formed the bulk of the centimeter-scale mat matrix;  
10 *L. ochracea* cells were only present in a 50-100  $\mu\text{m}$  zone at the leading edge of the mat. Time-  
11 lapse video (see videos 4,5, & 6 in Chan et al, 2016) of *L. ochracea* cells growing in a capillary  
12 tube clearly showed a filament of 30 – 40 cells translocating through liquid medium. There was  
13 no visual evidence for an organized sheath at the leading end of the filament, but a fully formed  
14 sheath was present at the trailing end of the filament. Presumably the intact sheath was the  
15 equivalent of the collapsed, immature or proto-sheaths seen in this work. The length of the cell  
16 filament itself did not grow during the short observational period (15 – 30 minutes) indicating  
17 sheath formation was dissociated from cell growth. This is fundamentally different from the  
18 mechanism of cell growth-based sheath-formation in *L. cholodnii* or *S. natans* as proposed by  
19 Takeda et al. (2009) What's also remarkable about the video observation of Chan et al, (2016) is  
20 that the cell filament is moving through the aqueous phase, i.e. not gliding on a surface, with no  
21 visible means of propulsion. This suggests an intriguing possibility that *L. ochracea* can propel  
22 itself through extrusion of the sheath.

23

## *L. ochracea* sheath formation and motility model

1 The mostly random orientation of the fibrils in young sheaths, and the estimated small value of  
2 elastic modulus (Equation 2) suggest the fibrils are flexible and sticky (Figures 2 & 3). As  
3 evidenced by the width of the fibers (25±5nm) equal to the thickness of the thinnest of immature  
4 sheaths (22±3nm), it appears the sheath wall can consist of as little as one monolayer of fibers.  
5 Older sheaths with cells inside are thicker, suggesting the fibers become a woven fabric with  
6 tensegrity that is maintained by hydration (when the sheaths dry out they collapse). That is older  
7 sheaths, most often empty, that continue to oxidize Fe(II) have a more rigid fabric that can resist  
8 capillary forces, so that during drying the sheath no longer collapses, and breakage actually  
9 causes it to shatter. Presumably the sheath fabric is largely self-organized, otherwise the cell  
10 would need to invest significant energy to organize the structure.

11

### Model of sheath formation:

13 Our results suggest an initial model for how *L. ochracea* produces an organized sheath. We  
14 speculate that orientation of the extruded fibrils might be driven by a combination of random  
15 diffusion and oriented filament motion (Figure 5a,b). Diffusion of the cells laterally and  
16 rotationally alone by the aqueous medium could explain random fibril orientations with respect  
17 to the sheath axis. Single cells are on a size scale ( $\leq 1 \mu\text{m}$ ) such that diffusion-driven motion can  
18 be substantial. If we estimate their diameter as a hydrodynamic radius,  $R_h$ , of 400nm, this would  
19 result in a lateral diffusion constant of:

$$20 \quad D = \frac{k_B T}{6\pi\eta R_h} = 4.0 \times 10^{-13} \frac{\text{m}^2}{\text{s}} \quad \text{Equation 5}$$

21 Where  $k_B$  is Boltzmann's constant, "T" is temperature in Kelvin, and " $\eta$ " is the viscosity of the  
22 medium.

23

### *L. ochracea* sheath formation and motility model

1 Bacterium of this size can travel a distance of the two dimensional sheath width on the order of a  
2 second ( $\Delta t = \langle R^2 \rangle / 4D$ ), where  $\Delta t$  is time interval,  $\langle R^2 \rangle$  is the root mean square hydrodynamic  
3 radius and  $D$  is defined in Equation 2. This time scale is insufficient for a scaffold to be  
4 established. However, almost all of the cells observed in this study appeared to be connected  
5 end-to-end during the growth stage of sheaths in a filament. This increases the hydrodynamic  
6 radius to micrometer length scales and thus reduces the diffusion coefficient (and decreases the  
7 diffusion time) by one or two orders of magnitude. In the absence of any other fluid dynamic  
8 interaction the smaller diffusion constant in a chain of cells would allow the scaffold to develop  
9 in a globular and random fashion as seen in Figure 4a, and schematically sketched in Figure 5a.  
10 Next to the immature sheath ( Figure 4a, at left with cells inside) is a mature sheath with long  
11 fibers parallel to the direction of the sheath length at right in the image. It is likely that  
12 mineralization is taking place all the time, so the grains grow in size as it appeared in the mature  
13 sheath and grain size analysis in Figure 4d. The image shows that there does not appear a  
14 preferred direction of orientation of the fibrils. However, Figure 4b is of a mature sheath with a  
15 very definite orientation of fibrils parallel to the sheath. We speculate in Figure 5a that slow  
16 growth yields more random orientation fibrils and Figure 5b might be explained by more rapid  
17 sheath growth. We speculate that the fibril orientation may be a result of lateral motion of the  
18 cell filaments during sheath production.

19

20 Since the images suggest a preferred orientation of the fibrils parallel or diagonal to the long  
21 length of the sheaths (Figures 4b), but not perpendicular, there must be some kind of mechanism  
22 that allows lateral motion of the cell filaments in the sheath, though no evidence of flagella have  
23 yet been observed using AFM. Recent video analysis (Chan et al., 2016) indicates the cells

### *L. ochracea* sheath formation and motility model

1 within sheaths grow parallel to oxygen and dissolved iron gradients. The resolution is  
2 insufficient to identify molecular motors pushing them along, but we can rule out hydrodynamic  
3 effects since the growth took place in static capillary tubes without the assistance of fluid flow.  
4 Based on the evidence collected in Figure 3 we speculate that the mechanism for motion is due  
5 to exuding sheath material. As the sheath material becomes increasingly dense due to the  
6 combinatorial effects of additional sheath material being added to the sheath, and Fe-oxides  
7 forming on the sheath, this results in a shear force that pushes the end of the cell line forward as  
8 described below.

9  
10 Model for cell motility: There are several known mechanisms of bacterial motility (Jarrell and  
11 McBride, 2008). The most common and well studied is cell swimming aided by flagella, either  
12 external, or in the case of spirochetes, intracellular. Gliding along surfaces is another common  
13 means of locomotion that is found in diverse bacteria that possess different gliding mechanisms.  
14 Another form of translocation is pili-based twitching motility that allows cells to move smaller  
15 distances over surfaces. There are also bacteria that lack flagellar, yet are able to swim, the best  
16 studied example being the cyanobacterium *Synechococcus* (Ehlers and Oster, 2012).

17  
18 In what appears to be a novel form of motility, filaments of *L. ochracea* cells might propel  
19 themselves through aqueous media via sheath production. Figure 5c proposes a model for how  
20 this motility might occur based on the observed extrusion of sheath material shown in Figures  
21 3a-c. One possibility *we will rule out*, but is valuable for reference purposes, is that the cell  
22 motion is driven by a pressure gradient between opposite ends of a sheath. The pressure gradient  
23 is caused by the resistance of the cells moving through the sheath, just like the viscosity of blood



## *L. ochracea* sheath formation and motility model

1 is responsible for blood pressure between the heart and the rest of the circulatory system. Under  
2 these conditions the Hagen-Poiseuille relationship could apply. Calculations will show that this  
3 externally driven flow will prove to be insufficient to drive cell motion, but provides an  
4 important reference point in terms of a pressure difference between opposite ends of the sheaths.  
5 We then show that cell motility can be explained in terms of an *internal* pressure gradient driven  
6 by sheath production of the cells themselves.

7  
8 The experimental speed "v" of sheath formation found previously in in laboratory measurements  
9 was 27mm/day=0.30μm/s (Chan et al 2016). We use this value also as an estimate for the speed  
10 of cell train motion along the newly forming sheath as well, since the vast majority of cells are  
11 found on the leading growth edge of the sheath. For a characteristic sheath diameter "d" = 2R of  
12 about 1μm this corresponds to a Reynolds number of:

$$13 \quad Re = \frac{v\rho d}{\eta} = 3 \times 10^{-7} \ll 1 \rightarrow \textit{laminar flow} \quad \text{Equation 6}$$

14 where "ρ" = density of water of 1000kg/m<sup>3</sup> and "η" is the viscosity of water ≈ 0.0010 Pa\*s at  
15 ambient temperatures. For laminar flow we can estimate the pressure difference "ΔP" from back  
16 to front of the cell train using the Hagen-Poiseuille relationship.

$$17 \quad \Delta P = \frac{8\eta L Q}{\pi R^4} = \frac{8\eta L v}{R^2} \quad \text{Equation 7}$$

18 Where Q is the flow rate of the cells equal πR<sup>2</sup>v, the cross sectional area of the sheath times the  
19 cells' speed through the sheath, "L" is the length scale of a typical chain of cells (≈20 cells at  
20 3μm/cell = 60μm) and the average sheath radius is taken from Table 1 (0.5μm). This calculation  
21 yields a pressure difference across the length of cells of about 0.60 Pa. Over the cross sectional  
22 area "a"=πr<sup>2</sup> of a cell of radius "r" the normal force F=ΔP\*a = 3.6x10<sup>-14</sup>N, which is an

### *L. ochracea* sheath formation and motility model

1 insignificant force on this microscopic scale and is probably not responsible for pushing the line  
2 of cells (cell "train") forward.

3  
4 However, if we speculate the force comes from *shear* interactions from *within* the sheath as the  
5 scaffold material is extruded along the length of the cell chain and squeezing the cells forward  
6 against the thickening and hardening sheath (Figure 5c), we can assume an area of the sheath's  
7 cylindrical shape along the length of the cell chain  $A = 2\pi r * L$ , resulting in a shear force  $F = \Delta P * A$   
8  $= 4.5 \times 10^{-10} \text{N}$ , or 0.45nN, which is about 40x larger than the force exerted by a bacterial  
9 flagellum (e.g. Darnton and Berg, 2006). This would cause the cell filament to translocate in a  
10 completely aqueous medium and could account for the motility observed by Chan et al. (2016).

11  
12 We are not aware of any other reports of this type of microbial shear force based propulsion that  
13 allow advancement and movement of a bacterial cell filament in the purely aqueous phase. An  
14 additional fascinating aspect of this motility is that it is also coupled to directionality in intact  
15 microbial mats formed by *L. ochracea*. The recent paper by Chan et al (2016) showed that *L.*  
16 *ochracea* sheaths are able to move in gradients of Fe(II) and O<sub>2</sub> in a uniform direction, i.e. non-  
17 randomly, indicating there is a link between the cells ability to couple chemo-sensing with  
18 motility. The mechanism for this process remains unknown.

19  
20 Acknowledgements. We would like to thank Dr. Emily Fleming for her help in sample collection  
21 and preparation, as well as helpful discussions. DE was supported by the National Science  
22 Foundation IOS 0951077 and NASA Exobiology grant NNX15AM11G. We also acknowledge  
23 receipt of an NSF Research Opportunity Award to support work in JV's laboratory at UNE.

## *L. ochracea* sheath formation and motility model

### 1 **References**

- 2 Chan CS, Fakra SC, Edwards DC, Emerson D, Banfield JF. 2009. Iron oxyhydroxide  
3 mineralization on microbial extracellular polysaccharides.” *Geochim Cosmochim Acta* 73:3807-  
4 3818.
- 5 Chan CS, Mcallister SM, Leavitt AH, Glazer BT, Krepski ST and Emerson D. 2016. The  
6 Architecture of Iron Microbial Mats Reflects the Adaptation of Chemolithotrophic Iron  
7 Oxidation in Freshwater and Marine Environments. *Frontiers Microbiol* 7:796.  
8 doi:10.3389/fmicb.2016.00796.
- 9 Darnton NC, Berg HC. 2007. Force-Extension Measurements on Bacterial Flagella: Triggering  
10 Polymorphic Transformations. *Biophysical J* 92:2230-2236. doi:10.1529/biophysj.106.094037.
- 11 Ehlers K, Oster G. 2012. On the mysterious propulsion of *Synechococcus*, PLoS ONE  
12 7(5):e036081. doi:10.1371/journal.pone.0036081.
- 13 Ema T, Miyazaki Y, Taniguchi T, Takada J. 2013. Robust Porphyrin Catalysts Immobilized on  
14 Biogenous Iron Oxide for the Repetitive Conversions of Epoxides and CO<sub>2</sub> into Cyclic  
15 Carbonates. *Green Chem* 15: 2485. doi:10.1039/c3gc41055b.
- 16 Emerson D, Ghiorse WC. 1993. “Ultrastructure and Chemical Composition of the Sheath of  
17 *Leptothrix discophora* SP-6.” *Appl Environ Microbiol* 75:7808-7818.
- 18 Emerson D, de Vet W. 2015. The Role of FeOB in Engineered Water Ecosystems: a Review. *J J*  
19 *Am Water Works Assoc* 107 (January): E47–E57. doi:10.5942/jawwa.2015.107.0004.

## *L. ochracea* sheath formation and motility model

- 1 Emerson D, Fleming EJ, Mcbeth JM. 2010. Iron-Oxidizing Bacteria: an Environmental and
- 2 Genomic Perspective. *Ann Rev Microbiol* 64 (1): 561–583.
- 3 doi:10.1146/annurev.micro.112408.134208.
- 4 Fleming EJ, Langdon AE, Martinez-Garcia M, Stepanauskas R, Poulton NJ, Masland EDP,
- 5 Emerson D. 2011. What's New Is Old: Resolving the Identity of *Leptothrix ochracea* Using
- 6 Single Cell Genomics, Pyrosequencing and FISH. *PLoS ONE* 6 (3): e17769.
- 7 doi:10.1371/journal.pone.0017769.t001.
- 8 Furutani M, Suzuki T, Ishihara H, Hashimoto H, Kunoh H, Takada, J. 2011. Initial assemblage
- 9 of bacterial saccharic fibrils and element deposition to form an immature sheath in cultured
- 10 *Leptothrix* sp. strain OUMS1. *Minerals*, 1:157–166.
- 11 Hashimoto H, Yokoyama S, Asaoka H, Kusano Y, Ikeda Y, Seno M, Takada J, Fujii T,
- 12 Nakanishi M, Murakami R. 2006. Characteristics of hollow microtubes consisting of amorphous
- 13 iron oxide nanoparticles produced by iron oxidizing bacteria, *Leptothrix ochracea*. *J. Magnetism*
- 14 *Magnetic Mater* 310:2405-2407.
- 15 Ivanovska IL, de Pablo PJ, †, Ibarra B, Sgalari G, MacKintosh FC, Carrascosa JL, Schmidt CF,
- 16 and Wuite GJL. 2004. Bacteriophage capsids: Tough nanoshells with complex elastic properties.
- 17 *Proc Natl Acad Sci U S A*. 101(20): 7600–7605. doi: 10.1073/pnas.0308198101.
- 18 James RE, Scott SD, Fortin D, Clark ID, Ferris FG. 2012. Regulation of Fe<sup>3+</sup>-oxide Formation
- 19 Among Fe<sup>2+</sup>-oxidizing Bacteria. *Geomicrobiol J* 29:537-543.
- 20 Jarrell KF, McBride MJ. 2008. The surprisingly diverse ways that prokaryotes move. *Nature Rev*
- 21 *Microbiol* 6:466-476 doi:10.1038/nrmicro1900

## *L. ochracea* sheath formation and motility model

- 1 Kunoh T, Kunoh H, Takada J. 2015. Perspectives on the Biogenesis of Iron Oxide Complexes
- 2 Produced by *Leptothrix*, an Iron-Oxidizing Bacterium and Promising Industrial Applications for
- 3 Their Functions. JMicrobial Biochem Tech 07 (06). doi:10.4172/1948-5948.1000249.
- 4 Putnam C, Igarashi M, Kaneko R. 1995. Quantitative Determination of Friction Coefficients by
- 5 Friction Force Microscopy. Japan Soc. Ap. Phys. 34 2B: L264.
- 6 Robichon D, Girard JC, Cenatiempo Y, Cavellier JF. 1999. Atomic force microscopy imaging of
- 7 dried or living bacteria. C. R. Acad. Sci. Paris, Life Sciences, 322:687–693.
- 8 Roden EE, McBeth JM, Blothe M, Percak-Dennett EM, Fleming EJ, Holyoke RR, Luther III
- 9 GW, Emerson D, Schieber J. 2012. The Microbial Ferrous Wheel in a Neutral pH Groundwater
- 10 Seep. Frontiers Microbiol 3:172. doi:10.3389/fmicb.2012.00172/.
- 11 Sakuma R, Hashimoto H, Kobayashi G, Fujii T, Nakanishi M, Kanno R, Takano M, Takada J.
- 12 2015. High-rate performance of a bacterial iron-oxide electrode material for lithium-ion battery.
- 13 Materials Lett 139:414-417. doi:10.1016/j.matlet.2014.10.126.
- 14 Sawayama M, Suzuki T, Kasai, T, Furutani M, Miyata N, Hashimoto H, Kunoh H, Takada J.
- 15 2011. Isolation of a *Leptothrix* strain, OUMSI from Ocherous Deposits in Groundwater. Curr.
- 16 Microbiol 63:173-180.
- 17 Suzuki T, Shihara H, Furutani M, Shiraishi T, Kunoh H, Takada JA. 2012. Novel Method for
- 18 Culturing of *Leptothrix* sp. Strain OUMSI in Natural Conditions. Minerals 2:118-128.
- 19 Takeda M, Makita H, Ohno K, Nakahara Y, Koizumi J. 2005. Structural Analysis of the Sheath
- 20 of a Sheathed Bacterium, *Leptothrix cholodnii*. International J Biological Macromolecules
- 21 37:92–98.

## *L. ochracea* sheath formation and motility model

- 1 Takeda M, Miyanoiri Y, Nogami T, Oda K, Saito T, Kato K, Koizumi JI, Katahira M. 2007.
- 2 Structural Analysis of the Fundamental Polymer of the Sheath Constructed by *Sphaerotilus*
- 3 *natans*. Biosci Biotechnol Biochem 71:2992–2998.
- 4 Takeda M, Kondo K, Yamada M, Koizumi JI, Mashima T, Matsugami A, Katahira M. 2009.
- 5 Solubilization and structural determination of a glycoconjugate which is assembled into the
- 6 sheath of *Leptothrix cholodnii*. International Journal of Biological Macromolecules. 46(2) 206-
- 7 211 doi:10.1016/j.ijbiomac.2009.12.006.
- 8 Takeda M1, Kawasaki Y, Umezu T, Shimura S, Hasegawa M, Koizumi J. 2012a. Patterns of
- 9 sheath elongation, cell proliferation, and manganese(II) oxidation in *Leptothrix cholodnii*. Arch
- 10 Microbiol 194:667-73. doi: 10.1007/s00203-012-0801-6. Epub 2012 Mar 4.
- 11 Takeda M1, Umezu T, Kawasaki Y, Shimura S, Kondo K, Koizumi J. 2012b. A spatial
- 12 relationship between sheath elongation and cell proliferation in *Sphaerotilus natans*. Biosci
- 13 Biotechnol Biochem. 76:2357-9.
- 14 van Veen WL, Mulder, EG Deinema MH. 1978. The *Sphaerotilus-Leptothrix* group of bacteria.
- 15 Microbiological Rev 42:329-356.
- 16 Vesenka J, Tang CL, Guthold M, Keller D, Delaine E, & Bustamante C. 1992. A substrate
- 17 preparation for imaging biomolecules with the scanning force microscope. Ultramicroscopy, 42-
- 18 44:1243-1249.
- 19 Vesenka J, Manne S, Giberson R, Marsh R, & Henderson E. 1993. Colloidal gold particles as an
- 20 incompressible Atomic Force Microscopy imaging standard for assessing the compressibility of
- 21 biomolecules. Biophysical J 65:992-997.

*L. ochracea* sheath formation and motility model

Table 1:

| Height <sub>cell</sub><br>(nm) | Width <sub>cell</sub><br>(nm) | Length <sub>cell</sub><br>(nm) | Thickness <sub>sheath</sub><br>collapsed (nm) | Width <sub>sheath</sub><br>collapsed (nm) | Height <sub>sheath</sub><br>intact (nm) | Width <sub>sheath</sub><br>intact (nm) | ID/OD <sub>sheath</sub><br>intact (nm) |
|--------------------------------|-------------------------------|--------------------------------|-----------------------------------------------|-------------------------------------------|-----------------------------------------|----------------------------------------|----------------------------------------|
| 140-340                        | 750-910                       | 1800-4100                      | 22 - 250                                      | 1800 - 2200                               | 950 - 1200                              | 1350 - 2200                            | 970/1150                               |

1

2

3

4

*L. ochracea* sheath formation and motility model

1 Table 1 summarizes several hundred measurements as a set of ranges that appear to depend only on the age of sheaths, based on the  
2 observation that older sheaths have thicker walls. The outer diameters of the sheaths are a maximum of 1200nm with wall thicknesses  
3 ranging from 22 to  $200 \pm 3$ nm depending on age of sheath. Details of the polysaccharide scaffold can be imaged at high resolution and  
4 suggest the sheath material is subject to strong self-adhesion. Lastly, high-resolution images of cells indicate the dried cells have  
5 diameters of approximately  $500 \pm 10$ nm and lengths ranging from 1800 to 4100nm.

6



Figure 1

1  
2  
3

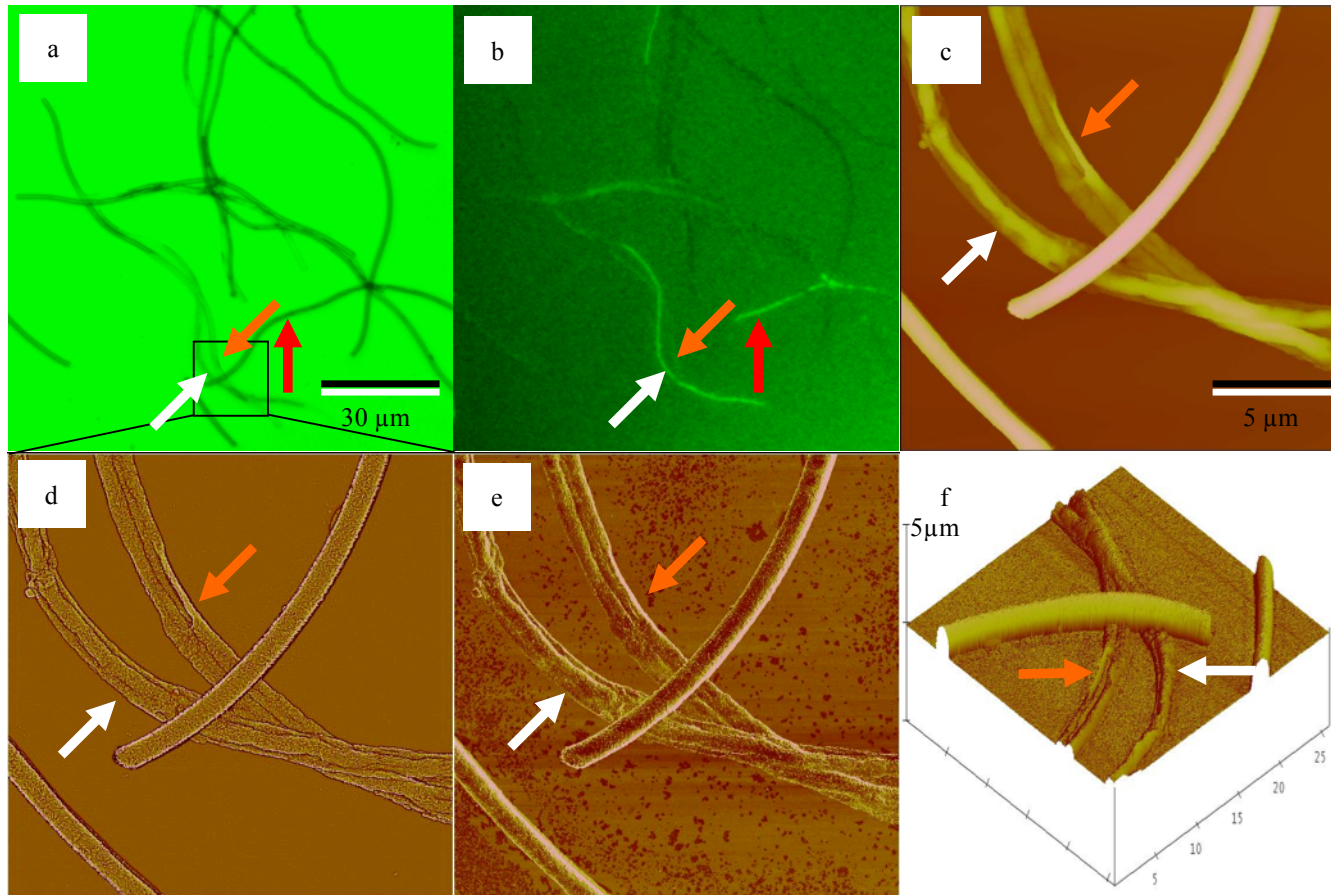

## *L. ochracea* sheath formation and motility model

1 **Figure 1:** (a) Bright field image of intact and collapsed cells (b) and same region fluorescently stained Syto 13 revealing *L. ochracea*  
2 cells in sheaths. Red arrow labeled darker intact *L. ochracea* sheath with cells inside but invisible to the AFM because of the lack of  
3 topographic relief. Orange arrows represent empty collapsed sheath and white arrows identifies cells the AFM can detect below a  
4 collapsed sheath (c) AFM height image zoomed into boxed area in the bright field image and confirmed the state of the sheaths as  
5 either being intact or collapsed as well as the presence of the cells inside the collapsed sheath. (d) is a high-pass filtered height image  
6 used throughout the remainder of the figures to identify detailed nanostructures. (e) is a simultaneously captured phase image  
7 indicating adhesive interactions between tip and substrate but no obvious interactions with the sheaths. No obvious phase interactions  
8 were detected so only high passed filtering images are presented in the remainder of this paper (f) is a three-dimensional rendering of  
9 the height image clearing showing the substantial height differences between intact and collapsed sheaths. Optical images (a) and (b)  
10 are 150 $\mu$ m a side. AFM images (c)-(f) are 25.6 $\mu$ m scan size. Vertical scale on (c) is 0nm to 2000 nm, (d) is 0nm to 500nm, (e) is 0 $^{\circ}$   
11 to 50 $^{\circ}$  (from dark brown to white). (f) has a highly exaggerated vertical scale of 5 $\mu$ m from the substrate to top of scale bar to more  
12 easily display differences between intact and collapsed sheaths clearly indicating the topographic nature of (c). The white and orange  
13 arrows identify the same features found in the other five in this rotated image.

14

1

Figure 2

2

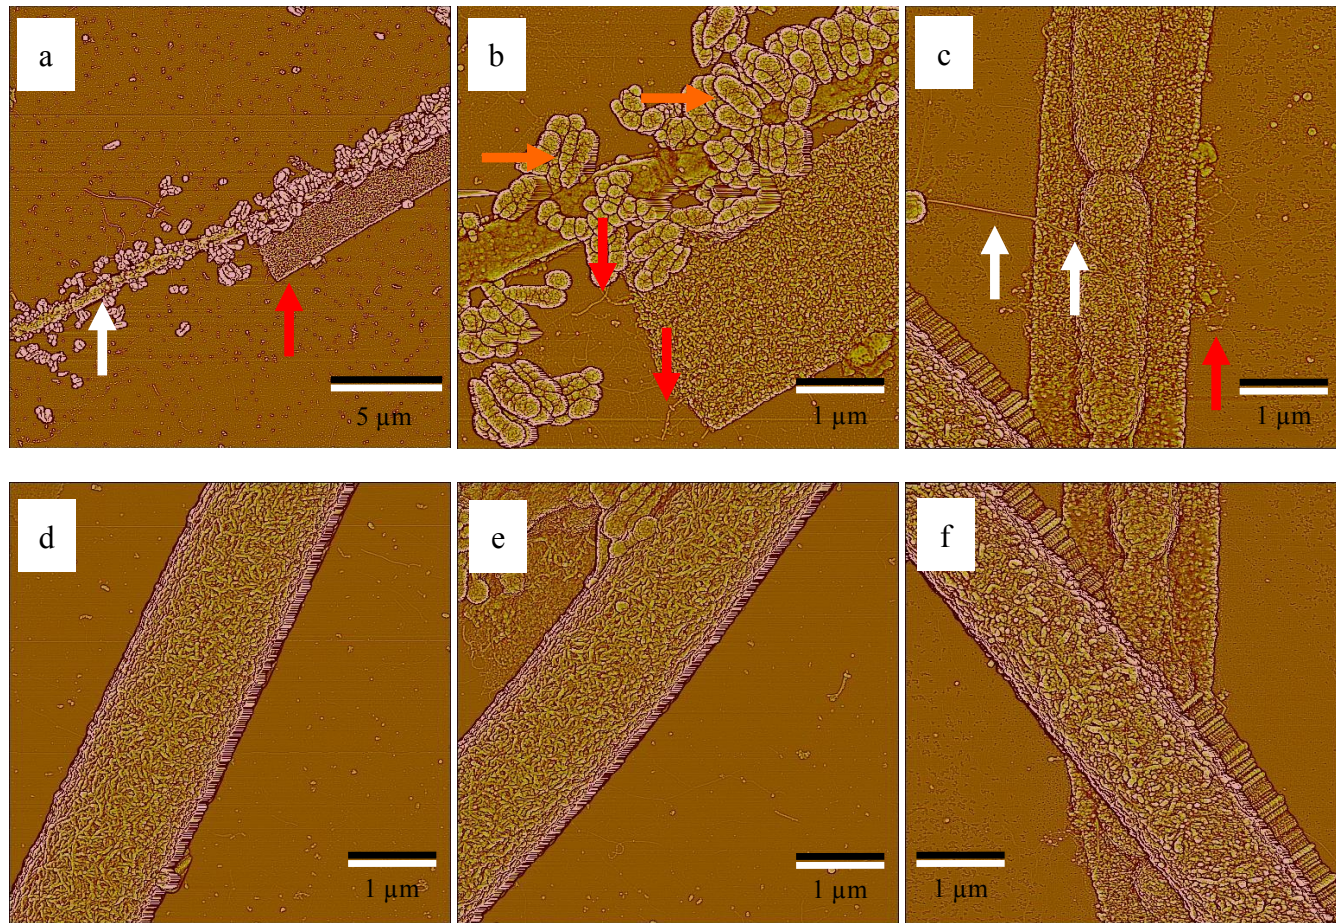

### *L. ochracea* sheath formation and motility model

1 **Figure 2:** High pass filtered images immature sheaths and fresh intact sheaths have sharply defined edges. (a) is a low magnification  
2 view of naked cells (white arrow) and empty immature sheath (red arrow). (b) zooms into the center of (a) and highlights long linear  
3 sticky fibrils (red arrows, single fibrils of average width  $22\pm 5\text{nm}$ ), also in c) that compose the scaffold of the sheaths. The purple  
4 arrows identify large, unidentified bulbous structures surrounding the cells, which appear to be associated with degradation of the  
5 cells. These structures are not found near the cells still encased in the sheaths as in the example shown in (c). Evidence that the cells  
6 are inside the sheath comes from the continuity of the scaffold over the mica substrate and cells (white arrow on sheath of average  
7 width  $24\pm 5\text{nm}$ ). (d-f) exemplify how the fibrils are woven into the scaffold. In top view (not shown) the collapsed sheath is  $45\pm 3\text{nm}$   
8 thick (top and bottom layer) and  $22\pm 3\text{nm}$  thick just the bottom layer. This suggests the sheath's consists of monolayers of fibrils. The  
9 color scale represents height out of the plane of the paper that is 0nm (dark brown) to 50nm (white) for all images.

10

1  
2

Figure 3

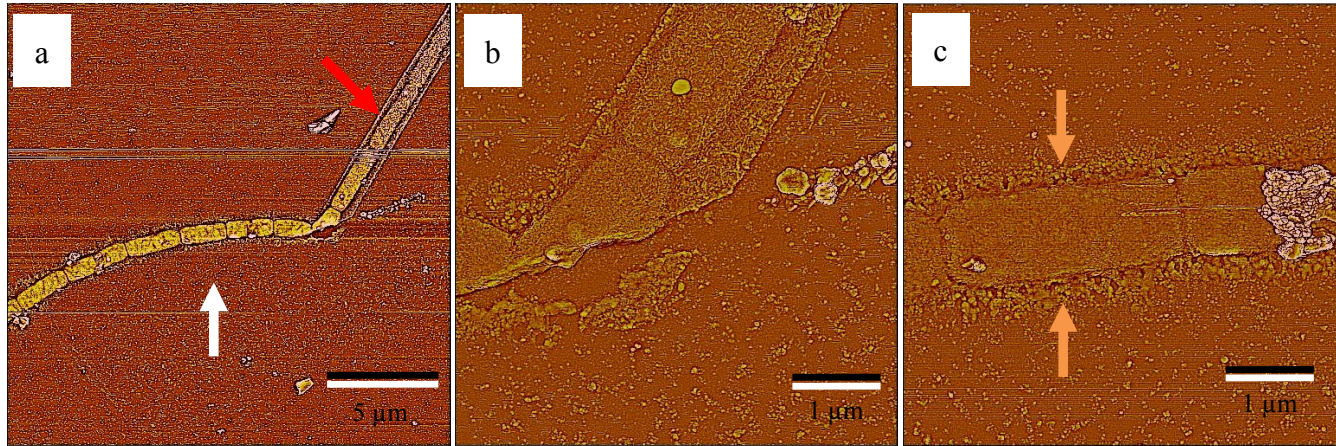

*L. ochracea* sheath formation and motility model

1 **Figure 3:** Overview (a) of high pass filter from topography of cells found both within (red arrow) and outside (white arrow) a fresh  
2 sheath. Within the sheath (b) the source of the sheath material coming from the cells is not possible to determine. However, when the  
3 cells are naked (c) scaffold material clearly appears to be exuded from the cell perimeter (orange arrows covering the length of both  
4 sides of the cell). The highest concentration of scaffold material appears to drop off with distance perpendicular to cell train direction  
5 to a width approximately equivalent to the sheath diameter seen in (b), suggesting a nascent stage of sheath production. The color  
6 scale represents height out of the plane of the paper that is 0nm (dark brown) to 50nm (white) for all images.

7

1  
2

Figure 4

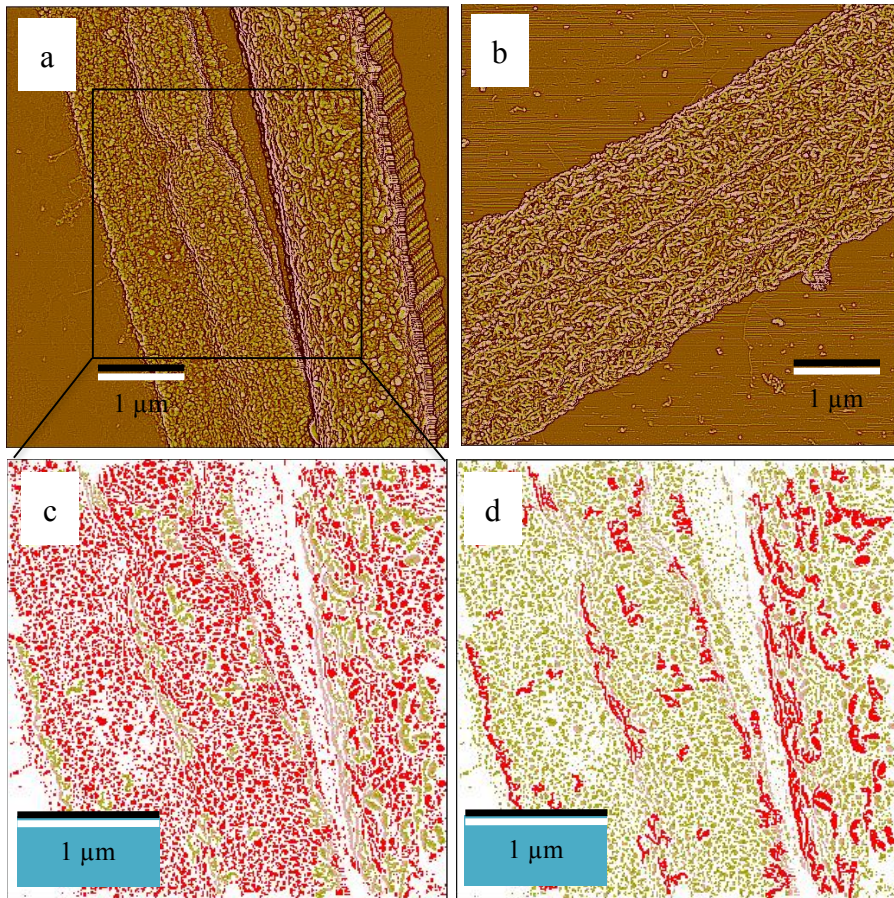

*L. ochracea* sheath formation and motility model

1 **Figure 4:** (a) is a high pass filtered AFM images of both immature, collapsed sheath with cell inside (left hand side) and a mature  
2 intact sheath (right hand side). In an extreme case (b) exceptionally long fibers parallel to the length of the tube have been observed.  
3 Grain size analysis of the boxed region in (a) is detailed in (c) and (d). The analysis on the same region indicates that the younger  
4 fresh sheath is primarily made of smaller fibrils (c, red spots) and the older sheath has more long fibrils (d, red squiggly lines)  
5 indicating a difference between the two phases of sheath growth. The older sheath (b) is almost exclusively made of long fibrils  
6 (analysis not shown but obviously visible in the image.) Figures 4a,b color scale represents height out of the plane of the paper that is  
7 0nm (dark brown) to 50nm (white) for all images. Figures 4c,d identifies particles of different sizes.

8



*L. ochracea* sheath formation and motility model

Figure 5

1

2

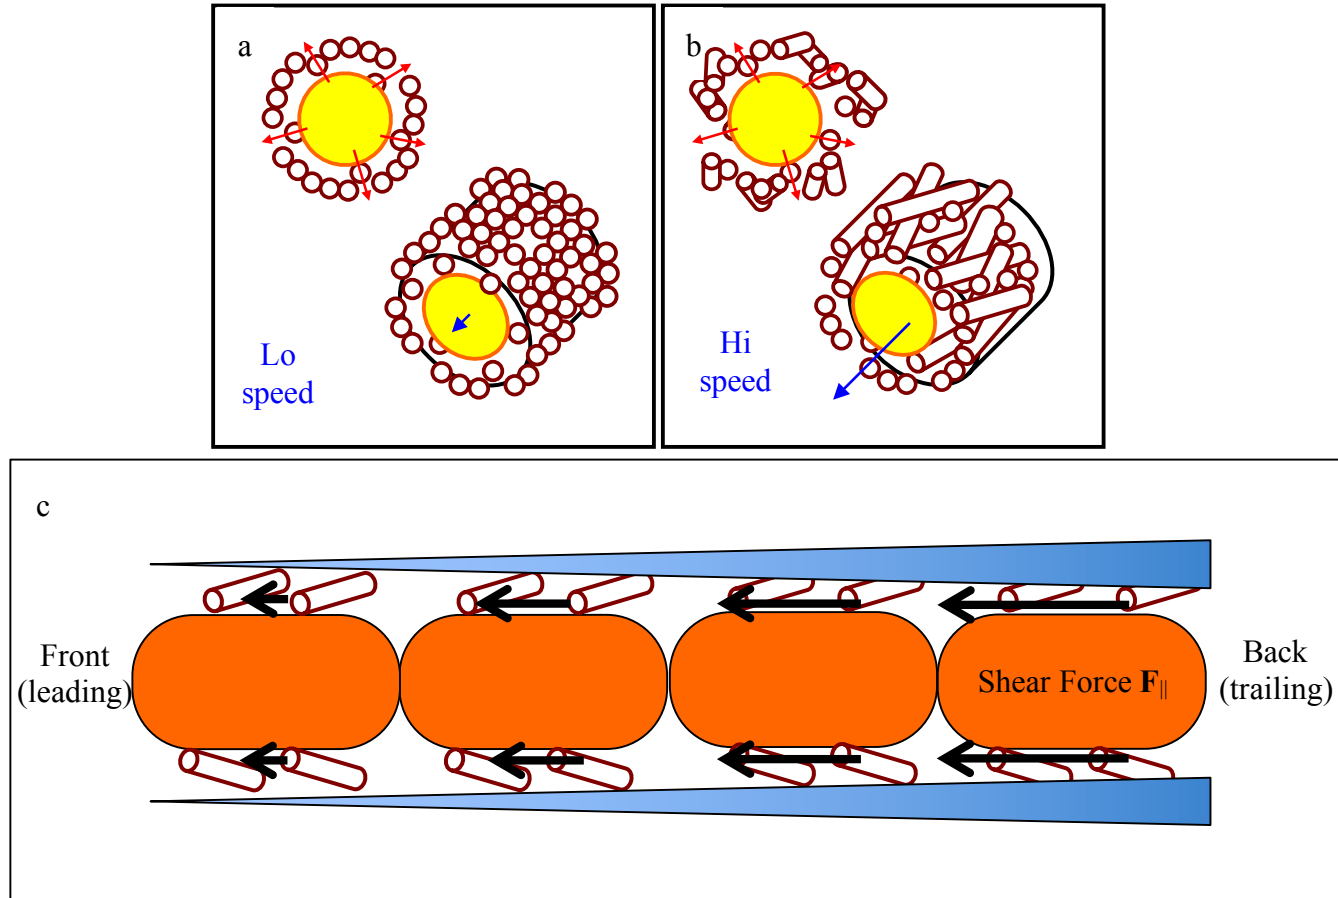

*L. ochracea* sheath formation and motility model

1 **Figure 5:** Based on Figure 4's different grain sizes of the sheath materials we speculate the following. In (a) the fibrils within the  
2 sheath are globular perhaps do to low speed cell motility, whereas in (b) the fibrils are much longer because the cells are moving at  
3 higher speed along the length of the developing sheath. Further Figure 3 suggests a mechanism for growth of the sheath that is  
4 described in (c): a proposed motility mechanism based on extrusion of sheath material that pushes the cell train forward through an  
5 average shear force " $F_{\parallel}$ " as the sheath material thickens and hardens behind the advancing cell train. The shear force is greatest where  
6 the sheath squeezes tighter, and less at the leading edge (black arrows).
